# Supplementary material for: The Causality between Human Immunoglobulin G (IgG) N-Glycosylation and Aging: A Mendelian Randomization Study
Source: MDPI journal article supplement (doi:10.3390/molecules29061281), 2024-03-14
Supplement: s1 [file s1]

## **SUPPLEMENTAL MATERIAL**

### **The Causality between Human Immunoglobulin G (IgG) N-Glycosylation and Aging: A Mendelian Randomization Study**

Wenxin Sun <sup>1</sup>, Xuening Jian <sup>1</sup>, Jie Zhang <sup>1</sup>, Xiaoni Meng <sup>1</sup>, Haotian Wang <sup>1</sup>, Deqiang Zheng <sup>1</sup>, Lijuan Wu <sup>1</sup> and Youxin Wang <sup>2,3,4,\*</sup>

1 School of Public Health, Capital Medical University, Beijing 100069, China;  
sunwx\_ada@163.com (W.S.) ; jian\_0628@126.com (X.J.); zhangjie@ccmu.edu.cn (J.Z.);  
mengxiaoni385@163.com (X.M.); sdwanghaotian@126.com (H.W.); deqiangzheng@163.com  
(D.Z.); wujuan811017@163.com (L.W.)

2 Beijing Key Laboratory of Clinical Epidemiology, Capital Medical University, Beijing  
100069, China

3 School of Public Health, North China University of Science and Technology, Tangshan  
063210, China

4 Centre for Precision Medicine, Edith Cowan University, Perth 6027, Australia

\* Correspondence: wangy@ccmu.edu.cn or sdwangyouxin@163.com

#### **Contents**

**Supplementary Table S1. Characteristics of SNPs associated with IgG N-glycosylation traits**

**Supplementary Table S2. Estimates of the causal effect of IgG N-glycosylation on frailty index and telomere length via two-sample MR**

**Supplementary Table S3. Estimates of the causal effect of IgG N-glycosylation on the frailty index via multivariable MR**

**Supplementary Table S4. Estimates of the causal effect of IgG N-glycosylation on telomere length via multivariable MR**

**Supplementary Table S1.** Characteristics of SNPs associated with IgG N-glycosylation traits

| SNPs        | EA | RA | EAF   | N    | Beta   | SE    | <i>p</i> | F      |
|-------------|----|----|-------|------|--------|-------|----------|--------|
| <b>GP2</b>  |    |    |       |      |        |       |          |        |
| rs10483775  | A  | G  | 0.017 | 7949 | -0.436 | 0.065 | 1.50E-11 | 44.99  |
| rs11748193  | A  | T  | 0.399 | 7648 | 0.110  | 0.018 | 4.31E-10 | 37.35  |
| rs11847263  | T  | G  | 0.647 | 8044 | -0.273 | 0.018 | 1.32E-54 | 230.03 |
| rs7789913   | T  | C  | 0.395 | 8089 | -0.154 | 0.017 | 1.36E-19 | 82.06  |
| rs7812088   | A  | G  | 0.119 | 8089 | -0.250 | 0.026 | 2.06E-22 | 92.46  |
| rs907091    | T  | C  | 0.490 | 7980 | -0.133 | 0.017 | 1.23E-14 | 61.21  |
| <b>GP4</b>  |    |    |       |      |        |       |          |        |
| rs10813951  | A  | G  | 0.732 | 7943 | -0.151 | 0.019 | 1.27E-15 | 63.16  |
| <b>GP6</b>  |    |    |       |      |        |       |          |        |
| rs17630758  | A  | G  | 0.152 | 8041 | -0.161 | 0.023 | 1.66E-12 | 49.00  |
| rs3824459   | T  | C  | 0.015 | 8008 | -0.447 | 0.075 | 2.79E-09 | 35.52  |
| rs6421315   | C  | G  | 0.383 | 7659 | -0.105 | 0.018 | 3.59E-09 | 34.03  |
| rs7281587   | A  | G  | 0.247 | 8090 | -0.142 | 0.019 | 2.18E-13 | 55.86  |
| rs7812088   | A  | G  | 0.119 | 8089 | -0.196 | 0.026 | 2.20E-14 | 56.83  |
| rs909674    | A  | C  | 0.734 | 8090 | -0.173 | 0.019 | 2.59E-19 | 82.91  |
| <b>GP7</b>  |    |    |       |      |        |       |          |        |
| rs11557466  | T  | C  | 0.473 | 8034 | 0.134  | 0.017 | 7.79E-15 | 62.13  |
| rs11651000  | A  | G  | 0.150 | 8034 | 0.154  | 0.024 | 6.14E-11 | 41.17  |
| rs11847263  | T  | G  | 0.647 | 8044 | -0.263 | 0.018 | 4.91E-51 | 213.48 |
| rs12587616  | T  | G  | 0.017 | 7949 | -0.373 | 0.066 | 1.25E-08 | 31.94  |
| rs7789913   | T  | C  | 0.395 | 8089 | -0.162 | 0.017 | 2.13E-21 | 90.81  |
| rs7812088   | A  | G  | 0.119 | 8089 | -0.198 | 0.026 | 1.30E-14 | 57.99  |
| <b>GP8</b>  |    |    |       |      |        |       |          |        |
| rs17303508  | T  | C  | 0.612 | 8054 | -0.094 | 0.017 | 3.53E-08 | 30.57  |
| rs2534669   | A  | G  | 0.137 | 7785 | -0.159 | 0.025 | 2.24E-10 | 40.45  |
| rs2834838   | A  | G  | 0.917 | 7900 | -0.168 | 0.031 | 4.59E-08 | 29.37  |
| rs4074453   | T  | C  | 0.758 | 8089 | 0.133  | 0.019 | 5.90E-12 | 49.00  |
| rs7865745   | A  | G  | 0.318 | 8053 | 0.103  | 0.018 | 9.03E-09 | 32.74  |
| <b>GP9</b>  |    |    |       |      |        |       |          |        |
| rs10813950  | A  | G  | 0.319 | 8077 | 0.120  | 0.018 | 2.85E-11 | 44.44  |
| rs2395488   | A  | G  | 0.651 | 8090 | 0.116  | 0.019 | 7.63E-10 | 37.27  |
| rs4074453   | T  | C  | 0.758 | 8089 | -0.215 | 0.019 | 1.52E-28 | 128.05 |
| rs7621161   | A  | C  | 0.284 | 7656 | 0.152  | 0.019 | 3.89E-16 | 64.00  |
| <b>GP10</b> |    |    |       |      |        |       |          |        |
| rs17630758  | A  | G  | 0.152 | 8041 | -0.295 | 0.023 | 5.23E-38 | 164.51 |
| rs3848370   | C  | G  | 0.224 | 3611 | 0.183  | 0.034 | 4.93E-08 | 28.97  |
| rs4561508   | T  | C  | 0.105 | 8002 | 0.163  | 0.028 | 5.70E-09 | 33.89  |
| rs4821897   | A  | G  | 0.260 | 7860 | 0.215  | 0.020 | 1.47E-27 | 115.56 |
| rs6570330   | A  | G  | 0.427 | 8090 | -0.140 | 0.017 | 4.35E-16 | 67.82  |
| rs7257072   | T  | C  | 0.515 | 8090 | -0.122 | 0.017 | 1.59E-13 | 51.50  |

|            |   |   |       |      |        |       |           |        |
|------------|---|---|-------|------|--------|-------|-----------|--------|
| rs7789913  | T | C | 0.395 | 8089 | -0.131 | 0.017 | 1.89E-14  | 59.38  |
| rs8080583  | A | C | 0.216 | 6063 | 0.144  | 0.025 | 6.26E-09  | 33.18  |
| rs9640023  | A | G | 0.221 | 7736 | -0.117 | 0.021 | 1.21E-08  | 31.04  |
| GP11       |   |   |       |      |        |       |           |        |
| rs17630758 | A | G | 0.152 | 8041 | -0.234 | 0.023 | 9.45E-25  | 103.51 |
| rs4821897  | A | G | 0.260 | 7860 | 0.151  | 0.020 | 1.61E-14  | 57.00  |
| rs7747738  | T | C | 0.031 | 5898 | 0.338  | 0.062 | 4.31E-08  | 29.72  |
| rs9385856  | T | C | 0.574 | 8089 | 0.106  | 0.017 | 3.84E-10  | 38.88  |
| GP12       |   |   |       |      |        |       |           |        |
| rs11557467 | T | G | 0.510 | 8090 | 0.101  | 0.017 | 4.66E-09  | 35.30  |
| rs11650354 | T | C | 0.167 | 8090 | 0.138  | 0.023 | 9.15E-10  | 36.00  |
| rs11847263 | T | G | 0.647 | 8044 | -0.234 | 0.018 | 1.43E-40  | 169.00 |
| rs1555926  | T | C | 0.789 | 8090 | -0.118 | 0.020 | 6.96E-09  | 34.81  |
| rs6421315  | C | G | 0.383 | 7659 | -0.120 | 0.018 | 2.15E-11  | 44.44  |
| GP13       |   |   |       |      |        |       |           |        |
| rs17775791 | T | C | 0.739 | 7759 | -0.168 | 0.019 | 1.31E-18  | 78.18  |
| rs7789913  | T | C | 0.395 | 8089 | -0.123 | 0.017 | 5.40E-13  | 52.35  |
| rs874232   | T | C | 0.565 | 8090 | 0.119  | 0.017 | 7.85E-13  | 49.00  |
| GP14       |   |   |       |      |        |       |           |        |
| rs10096810 | A | G | 0.627 | 8090 | 0.100  | 0.017 | 4.47E-09  | 34.60  |
| rs10813951 | A | G | 0.732 | 7943 | 0.176  | 0.019 | 1.61E-20  | 85.81  |
| rs17775791 | T | C | 0.740 | 7759 | -0.192 | 0.019 | 4.81E-24  | 102.12 |
| rs7758383  | A | G | 0.521 | 8020 | 0.125  | 0.017 | 9.61E-14  | 54.07  |
| GP15       |   |   |       |      |        |       |           |        |
| rs17630758 | A | G | 0.152 | 8041 | -0.181 | 0.023 | 2.23E-15  | 61.93  |
| rs17775791 | T | C | 0.740 | 7759 | -0.155 | 0.019 | 4.14E-16  | 66.55  |
| rs199456   | T | C | 0.196 | 8064 | 0.162  | 0.022 | 6.76E-14  | 54.22  |
| rs4821897  | A | G | 0.260 | 7860 | 0.140  | 0.020 | 1.15E-12  | 49.00  |
| rs6421315  | C | G | 0.383 | 7659 | -0.102 | 0.018 | 1.17E-08  | 32.11  |
| rs6570330  | A | G | 0.427 | 8090 | -0.125 | 0.017 | 4.06E-13  | 54.07  |
| rs6964421  | T | C | 0.328 | 8090 | 0.117  | 0.018 | 5.31E-11  | 42.25  |
| rs741706   | T | C | 0.543 | 7648 | -0.105 | 0.017 | 6.15E-10  | 38.15  |
| rs9319617  | T | C | 0.499 | 7750 | 0.103  | 0.017 | 1.26E-09  | 36.71  |
| GP16       |   |   |       |      |        |       |           |        |
| rs1122979  | A | G | 0.112 | 8029 | 0.202  | 0.027 | 6.33E-14  | 55.97  |
| rs2745851  | A | G | 0.377 | 8087 | 0.095  | 0.017 | 3.95E-08  | 31.23  |
| rs3099844  | A | C | 0.136 | 8090 | -0.227 | 0.031 | 1.12E-13  | 53.62  |
| rs3777178  | C | G | 0.215 | 8015 | -0.140 | 0.020 | 3.80E-12  | 49.00  |
| rs4074453  | T | C | 0.758 | 8089 | -0.197 | 0.019 | 1.33E-24  | 107.50 |
| rs6764279  | A | C | 0.285 | 8086 | -0.498 | 0.018 | 7.20E-167 | 765.44 |
| GP17       |   |   |       |      |        |       |           |        |
| rs11847263 | T | G | 0.647 | 8044 | -0.191 | 0.017 | 4.33E-28  | 126.23 |
| rs6583437  | A | G | 0.372 | 7788 | -0.095 | 0.017 | 4.22E-08  | 31.23  |
| GP18       |   |   |       |      |        |       |           |        |

|             |   |   |       |      |        |       |          |        |
|-------------|---|---|-------|------|--------|-------|----------|--------|
| rs10813951  | A | G | 0.732 | 7943 | 0.230  | 0.019 | 8.84E-34 | 146.54 |
| rs250555    | T | C | 0.860 | 7647 | -0.155 | 0.025 | 6.83E-10 | 38.44  |
| rs2725391   | T | C | 0.460 | 8090 | 0.100  | 0.017 | 1.95E-09 | 34.60  |
| rs7621161   | A | C | 0.284 | 7656 | -0.193 | 0.019 | 2.37E-25 | 103.18 |
| <b>GP19</b> |   |   |       |      |        |       |          |        |
| rs4424066   | A | G | 0.590 | 8090 | 0.111  | 0.018 | 7.45E-10 | 38.03  |
| rs8137426   | T | G | 0.255 | 7763 | 0.123  | 0.020 | 4.63E-10 | 37.82  |
| <b>GP20</b> |   |   |       |      |        |       |          |        |
| rs12986368  | T | C | 0.371 | 7717 | 0.116  | 0.018 | 3.39E-11 | 41.53  |
| <b>GP22</b> |   |   |       |      |        |       |          |        |
| rs3742597   | A | G | 0.750 | 8090 | -0.153 | 0.019 | 1.03E-15 | 64.84  |
| rs6583437   | A | G | 0.372 | 7788 | -0.125 | 0.017 | 5.56E-13 | 54.07  |
| rs7621161   | A | C | 0.284 | 7656 | -0.110 | 0.018 | 2.06E-09 | 37.35  |
| <b>GP23</b> |   |   |       |      |        |       |          |        |
| rs10813951  | A | G | 0.732 | 7943 | 0.176  | 0.019 | 1.37E-20 | 85.81  |
| rs4649042   | A | G | 0.360 | 8019 | -0.101 | 0.017 | 6.66E-09 | 35.30  |
| rs7621161   | A | C | 0.284 | 7656 | -0.179 | 0.019 | 4.28E-22 | 88.76  |
| rs909674    | A | C | 0.734 | 8090 | 0.186  | 0.019 | 2.16E-22 | 95.83  |
| <b>GP24</b> |   |   |       |      |        |       |          |        |
| rs7621161   | A | C | 0.284 | 7656 | -0.252 | 0.019 | 1.65E-42 | 175.91 |

IgG, immunoglobulin G; GP, glycan peak; SNP, single-nucleotide polymorphism; EA, effect allele; OA, other allele; SE, standard error; MAF, minor allele frequency.

**Supplementary Table S2.** Estimates of the causal effect of IgG N-glycosylation on frailty index and telomere length via two-sample MR

| Exposure | Outcome         | Method                    | Ivs | $\beta$ (95%CI)      | <i>p</i> |
|----------|-----------------|---------------------------|-----|----------------------|----------|
| GP2      | Frailty index   | Inverse variance weighted | 6   | -0.004(-0.030,0.022) | 0.758    |
|          |                 | Q-statistic               |     |                      | 0.022    |
|          |                 | Simple mode               | 6   | -0.020(-0.058,0.019) | 0.362    |
|          |                 | Weighted mode             | 6   | 0.021(-0.004,0.046)  | 0.153    |
|          |                 | Weighted median           | 6   | -0.001(-0.025,0.023) | 0.933    |
|          |                 | MR Egger                  | 6   | 0.041(-0.020,0.101)  | 0.259    |
|          |                 | egger_intercept           |     |                      | 0.193    |
|          |                 | MR-PRESSO                 | 6   | 0.008(-0.010,0.026)  | 0.423    |
|          |                 | global test               |     |                      | 0.168    |
|          | Telomere length | Inverse variance weighted | 6   | -0.006(-0.021,0.009) | 0.429    |
|          |                 | Q-statistic               |     |                      | 0.030    |
|          |                 | Simple mode               | 6   | -0.001(-0.022,0.020) | 0.940    |
|          |                 | Weighted mode             | 6   | 0.001(-0.013,0.015)  | 0.900    |
|          |                 | Weighted median           | 6   | -0.002(-0.015,0.011) | 0.790    |
|          |                 | MR Egger                  | 6   | 0.024(-0.006,0.054)  | 0.198    |
|          |                 | egger_intercept           |     |                      | 0.104    |
|          |                 | MR-PRESSO                 | 6   | -0.007(-0.018,0.004) | 0.288    |
|          |                 | global test               |     |                      | 0.233    |
| GP4      | Frailty index   | Wald ratio                | 1   | -0.048(-0.097,0.001) | 0.055    |
|          | Telomere length | Wald ratio                | 1   | 0.022(-0.008,0.051)  | 0.153    |
|          |                 | Inverse variance weighted | 6   | -0.002(-0.023,0.020) | 0.873    |
|          |                 | Q-statistic               |     |                      | 0.852    |
|          |                 | Simple mode               | 6   | -0.004(-0.045,0.036) | 0.841    |
|          |                 | Weighted mode             | 6   | -0.005(-0.045,0.035) | 0.832    |
|          | Frailty index   | Weighted median           | 6   | -0.004(-0.031,0.023) | 0.787    |
|          |                 | MR Egger                  | 6   | -0.015(-0.083,0.053) | 0.694    |
|          |                 | egger_intercept           |     |                      | 0.714    |
|          |                 | MR-PRESSO                 | 6   | -0.002(-0.011,0.008) | 0.773    |
| GP6      |                 | global test               |     |                      | 0.910    |
|          |                 | Inverse variance weighted | 6   | -0.002(-0.025,0.022) | 0.883    |
|          |                 | Q-statistic               |     |                      | 0.007    |
|          |                 | Simple mode               | 6   | 0.014(-0.01,0.039)   | 0.305    |
|          | Telomere length | Weighted mode             | 6   | 0.01(-0.015,0.035)   | 0.476    |
|          |                 | Weighted median           | 6   | 0.005(-0.012,0.022)  | 0.552    |
|          |                 | MR Egger                  | 6   | 0.062(0.015,0.108)   | 0.061    |
|          |                 | egger_intercept           |     |                      | 0.048    |
|          |                 | MR-PRESSO                 | 6   | 0.003(-0.014,0.021)  | 0.723    |
|          |                 | global test               |     |                      | 0.081    |
| GP7      | Frailty index   | Inverse variance weighted | 6   | 0.005(-0.013,0.023)  | 0.591    |
|          |                 | Q-statistic               |     |                      | 0.327    |

|     |                 |                           |   |                       |       |
|-----|-----------------|---------------------------|---|-----------------------|-------|
| GP8 | Telomere length | Simple mode               | 6 | -0.020(-0.063,0.023)  | 0.400 |
|     |                 | Weighted mode             | 6 | 0.021(-0.004,0.045)   | 0.165 |
|     |                 | Weighted median           | 6 | 0.012(-0.011,0.035)   | 0.313 |
|     |                 | MR Egger                  | 6 | 0.027(-0.038,0.093)   | 0.461 |
|     |                 | egger_intercept           |   |                       | 0.524 |
|     |                 | MR-PRESSO                 | 6 | -0.004(-0.019,0.011)  | 0.641 |
|     |                 | global test               |   |                       | 0.448 |
|     |                 | Inverse variance weighted | 6 | -0.010(-0.028,0.007)  | 0.244 |
|     |                 | Q-statistic               |   |                       | 0.013 |
|     |                 | Simple mode               | 6 | -0.031(-0.067,0.004)  | 0.147 |
|     |                 | Weighted mode             | 6 | 0.000(-0.017,0.018)   | 0.976 |
|     |                 | Weighted median           | 6 | -0.007(-0.021,0.007)  | 0.327 |
|     | Frailty index   | MR Egger                  | 6 | 0.038(-0.003,0.080)   | 0.147 |
|     |                 | egger_intercept           |   |                       | 0.075 |
|     |                 | MR-PRESSO                 | 6 | -0.013(-0.029,0.002)  | 0.155 |
|     |                 | global test               |   |                       | 0.106 |
|     |                 | Inverse variance weighted | 5 | -0.010(-0.049,0.030)  | 0.637 |
|     |                 | Q-statistic               |   |                       | 0.103 |
|     |                 | Simple mode               | 5 | 0.004(-0.041,0.050)   | 0.860 |
|     |                 | Weighted mode             | 5 | 0.008(-0.035,0.051)   | 0.741 |
|     |                 | Weighted median           | 5 | 0.003(-0.033,0.039)   | 0.868 |
|     |                 | MR Egger                  | 5 | 0.096(-0.077,0.269)   | 0.356 |
|     |                 | egger_intercept           |   |                       | 0.307 |
|     |                 | MR-PRESSO                 | 5 | 0.010(-0.038,0.058)   | 0.717 |
|     |                 | global test               |   |                       | 0.100 |
| GP9 | Telomere length | Inverse variance weighted | 5 | -0.007(-0.031,0.017)  | 0.574 |
|     |                 | Q-statistic               |   |                       | 0.102 |
|     |                 | Simple mode               | 5 | -0.022(-0.054,0.010)  | 0.249 |
|     |                 | Weighted mode             | 5 | -0.023(-0.050,0.005)  | 0.183 |
|     |                 | Weighted median           | 5 | -0.019(-0.041,0.004)  | 0.105 |
|     |                 | MR Egger                  | 5 | -0.107(-0.186,-0.029) | 0.075 |
|     |                 | egger_intercept           |   |                       | 0.083 |
|     |                 | MR-PRESSO                 | 5 | 0.011(-0.009,0.031)   | 0.328 |
|     |                 | global test               |   |                       | 0.237 |
|     |                 | Inverse variance weighted | 4 | -0.024(-0.067,0.020)  | 0.282 |
|     |                 | Q-statistic               |   |                       | 0.017 |
|     |                 | Simple mode               | 4 | -0.071(-0.147,0.004)  | 0.160 |
|     | Frailty index   | Weighted mode             | 4 | -0.002(-0.032,0.029)  | 0.928 |
|     |                 | Weighted median           | 4 | -0.010(-0.042,0.022)  | 0.525 |
|     |                 | MR Egger                  | 4 | 0.087(-0.054,0.227)   | 0.350 |
|     |                 | egger_intercept           |   |                       | 0.252 |
|     |                 | MR-PRESSO                 | 4 | 0.010(-0.038,0.058)   | 0.717 |
|     |                 | global test               |   |                       | 0.100 |
|     | Telomere length | Inverse variance weighted | 4 | 0.018(-0.015,0.050)   | 0.290 |

|      |                 |                              |   |                       |        |
|------|-----------------|------------------------------|---|-----------------------|--------|
| GP10 | Frailty index   | Q-statistic                  |   |                       | 0.001  |
|      |                 | Simple mode                  | 4 | 0.010(-0.012,0.032)   | 0.441  |
|      |                 | Weighted mode                | 4 | 0.011(-0.007,0.029)   | 0.314  |
|      |                 | Weighted median              | 4 | 0.013(-0.005,0.031)   | 0.164  |
|      |                 | MR Egger                     | 4 | -0.034(-0.175,0.108)  | 0.686  |
|      |                 | egger_intercept              |   |                       | 0.539  |
|      |                 | MR-PRESSO(Outlier-corrected) | 4 | 0.008(0.002,0.015)    | 0.235  |
|      |                 | global test                  |   |                       | 0.014  |
|      |                 | Inverse variance weighted    | 9 | 0.005(-0.016,0.026)   | 0.660  |
|      |                 | Q-statistic                  |   |                       | 0.059  |
|      |                 | Simple mode                  | 9 | 0.011(-0.015,0.037)   | 0.437  |
|      |                 | Weighted mode                | 9 | 0.009(-0.013,0.030)   | 0.469  |
|      | Telomere length | Weighted median              | 9 | 0.006(-0.014,0.027)   | 0.533  |
|      |                 | MR Egger                     | 9 | 0.023(-0.054,0.100)   | 0.574  |
|      |                 | egger_intercept              |   |                       | 0.639  |
|      |                 | MR-PRESSO                    | 9 | 0.009(-0.010,0.029)   | 0.364  |
|      |                 | global test                  |   |                       | 0.103  |
|      |                 | Inverse variance weighted    | 9 | -0.006(-0.018,0.007)  | 0.378  |
|      |                 | Q-statistic                  |   |                       | 0.051  |
|      |                 | Simple mode                  | 9 | -0.005(-0.021,0.011)  | 0.556  |
|      |                 | Weighted mode                | 9 | -0.006(-0.020,0.008)  | 0.415  |
|      |                 | Weighted median              | 9 | -0.007(-0.019,0.005)  | 0.282  |
|      |                 | MR Egger                     | 9 | 0.001(-0.045,0.047)   | 0.969  |
|      |                 | egger_intercept              |   |                       | 0.776  |
| GP11 | Frailty index   | MR-PRESSO                    | 9 | -0.002(-0.014,0.01)   | 0.702  |
|      |                 | global test                  |   |                       | 0.069  |
|      |                 | Inverse variance weighted    | 4 | -0.011(-0.042,0.020)  | 0.473  |
|      |                 | Q-statistic                  |   |                       | 0.155  |
|      |                 | Simple mode                  | 4 | 0.000(-0.046,0.047)   | 0.990  |
|      |                 | Weighted mode                | 4 | -0.001(-0.040,0.037)  | 0.957  |
|      |                 | Weighted median              | 4 | -0.003(-0.033,0.026)  | 0.826  |
|      |                 | MR Egger                     | 4 | -0.055(-0.128,0.018)  | 0.279  |
|      |                 | egger_intercept              |   |                       | 0.333  |
|      |                 | MR-PRESSO                    | 4 | -0.001(-0.024,0.022)  | 0.945  |
|      |                 | global test                  |   |                       | 0.367  |
|      |                 | Inverse variance weighted    | 4 | 0.014(-0.032,0.060)   | 0.547  |
|      | Telomere length | Q-statistic                  |   |                       | <0.001 |
|      |                 | Simple mode                  | 4 | -0.010(-0.030,0.010)  | 0.385  |
|      |                 | Weighted mode                | 4 | -0.010(-0.028,0.008)  | 0.346  |
|      |                 | Weighted median              | 4 | -0.010(-0.028,0.008)  | 0.272  |
|      |                 | MR Egger                     | 4 | 0.076(-0.037,0.189)   | 0.320  |
|      |                 | egger_intercept              |   |                       | 0.367  |
|      |                 | MR-PRESSO(Outlier-corrected) | 4 | -0.010(-0.015,-0.005) | 0.169  |
|      |                 | global test                  |   |                       | 0.007  |

|      |                 |                           |   |                      |       |
|------|-----------------|---------------------------|---|----------------------|-------|
| GP12 | Frailty index   | Inverse variance weighted | 5 | 0.018(-0.006,0.041)  | 0.149 |
|      |                 | Q-statistic               |   |                      | 0.287 |
|      |                 | Simple mode               | 5 | 0.015(-0.024,0.055)  | 0.486 |
|      |                 | Weighted mode             | 5 | 0.026(-0.003,0.054)  | 0.154 |
|      |                 | Weighted median           | 5 | 0.022(-0.004,0.048)  | 0.093 |
|      |                 | MR Egger                  | 5 | 0.060(-0.006,0.126)  | 0.175 |
|      |                 | egger_intercept           |   |                      | 0.278 |
|      |                 | MR-PRESSO                 | 5 | -0.011(-0.041,0.018) | 0.489 |
|      | Telomere length | global test               |   |                      | 0.251 |
|      |                 | Inverse variance weighted | 5 | -0.016(-0.035,0.003) | 0.096 |
|      |                 | Q-statistic               |   |                      | 0.075 |
|      |                 | Simple mode               | 5 | -0.017(-0.051,0.017) | 0.381 |
|      |                 | Weighted mode             | 5 | -0.005(-0.021,0.012) | 0.618 |
|      |                 | Weighted median           | 5 | -0.006(-0.023,0.010) | 0.454 |
|      |                 | MR Egger                  | 5 | 0.023(-0.022,0.069)  | 0.384 |
|      |                 | egger_intercept           |   |                      | 0.168 |
| GP13 | Frailty index   | MR-PRESSO                 | 5 | -0.014(-0.033,0.006) | 0.239 |
|      |                 | global test               |   |                      | 0.149 |
|      |                 | Inverse variance weighted | 3 | 0.012(-0.017,0.042)  | 0.411 |
|      |                 | Q-statistic               |   |                      | 0.914 |
|      |                 | Simple mode               | 3 | 0.017(-0.023,0.057)  | 0.501 |
|      |                 | Weighted mode             | 3 | 0.016(-0.022,0.055)  | 0.495 |
|      |                 | Weighted median           | 3 | 0.015(-0.018,0.049)  | 0.375 |
|      |                 | MR Egger                  | 3 | 0.027(-0.160,0.215)  | 0.823 |
|      | Telomere length | egger_intercept           |   |                      | 0.899 |
|      |                 | MR-PRESSO                 | 3 | -                    | -     |
|      |                 | global test               |   |                      | -     |
|      |                 | Inverse variance weighted | 3 | -0.023(-0.050,0.005) | 0.105 |
|      |                 | Q-statistic               |   |                      | 0.088 |
|      |                 | Simple mode               | 3 | -0.011(-0.040,0.018) | 0.537 |
|      |                 | Weighted mode             | 3 | -0.010(-0.035,0.015) | 0.518 |
|      |                 | Weighted median           | 3 | -0.013(-0.035,0.009) | 0.258 |
| GP14 | Frailty index   | MR Egger                  | 3 | 0.056(-0.135,0.248)  | 0.667 |
|      |                 | egger_intercept           |   |                      | 0.563 |
|      |                 | MR-PRESSO                 | 3 | -                    | -     |
|      |                 | global test               |   |                      | -     |
|      |                 | Inverse variance weighted | 4 | 0.026(0.003,0.050)   | 0.027 |
|      |                 | Q-statistic               |   |                      | 0.762 |
|      |                 | Simple mode               | 4 | 0.039(-0.002,0.080)  | 0.157 |
|      |                 | Weighted mode             | 4 | 0.016(-0.021,0.053)  | 0.458 |
|      |                 | Weighted median           | 4 | 0.022(-0.007,0.050)  | 0.139 |
|      |                 | MR Egger                  | 4 | 0.013(-0.081,0.107)  | 0.812 |
|      |                 | egger_intercept           |   |                      | 0.801 |
|      |                 | MR-PRESSO                 | 4 | 0.801(0.797,0.805)   | 0.016 |



|                              |                              |                           |                      |                       |       |
|------------------------------|------------------------------|---------------------------|----------------------|-----------------------|-------|
| GP15                         | Telomere length              | global test               |                      |                       | 0.240 |
|                              |                              | Inverse variance weighted | 4                    | -0.020(-0.037,-0.002) | 0.029 |
|                              |                              | Q-statistic               |                      |                       | 0.200 |
|                              |                              | Simple mode               | 4                    | -0.015(-0.040,0.011)  | 0.344 |
|                              |                              | Weighted mode             | 4                    | -0.012(-0.033,0.008)  | 0.321 |
|                              |                              | Weighted median           | 4                    | -0.016(-0.033,0.002)  | 0.085 |
|                              |                              | MR Egger                  | 4                    | 0.012(-0.063,0.086)   | 0.789 |
|                              |                              | egger_intercept           |                      |                       | 0.485 |
|                              | Frailty index                | MR-PRESSO                 | 4                    | -0.018(-0.036,-0.001) | 0.133 |
|                              |                              | global test               |                      |                       | 0.313 |
|                              |                              | Inverse variance weighted | 9                    | 0.013(-0.013,0.040)   | 0.326 |
|                              |                              | Q-statistic               |                      |                       | 0.030 |
|                              |                              | Simple mode               | 9                    | 0.009(-0.025,0.043)   | 0.612 |
|                              |                              | Weighted mode             | 9                    | 0.010(-0.022,0.043)   | 0.551 |
|                              |                              | Weighted median           | 9                    | 0.012(-0.014,0.037)   | 0.364 |
|                              |                              | MR Egger                  | 9                    | 0.055(-0.086,0.197)   | 0.469 |
| GP16                         | egger_intercept              |                           |                      | 0.571                 |       |
|                              | MR-PRESSO(Outlier-corrected) | 9                         | 0.003(-0.019,0.026)  | 0.777                 |       |
|                              | global test                  |                           |                      | 0.031                 |       |
|                              | Inverse variance weighted    | 9                         | -0.008(-0.023,0.007) | 0.291                 |       |
|                              | Q-statistic                  |                           |                      | 0.071                 |       |
|                              | Simple mode                  | 9                         | -0.011(-0.031,0.010) | 0.332                 |       |
|                              | Weighted mode                | 9                         | -0.010(-0.030,0.010) | 0.338                 |       |
|                              | Telomere length              | Weighted median           | 9                    | -0.009(-0.024,0.005)  | 0.212 |
| MR Egger                     |                              | 9                         | 0.035(-0.040,0.109)  | 0.396                 |       |
| egger_intercept              |                              |                           |                      | 0.293                 |       |
| MR-PRESSO(Outlier-corrected) |                              | 9                         | 0.004(-0.007,0.014)  | 0.501                 |       |
| global test                  |                              |                           |                      | 0.041                 |       |
| Inverse variance weighted    |                              | 6                         | -0.003(-0.015,0.009) | 0.623                 |       |
| Q-statistic                  |                              |                           |                      | 0.782                 |       |
| Frailty index                |                              | Simple mode               | 6                    | -0.006(-0.029,0.016)  | 0.605 |
|                              | Weighted mode                | 6                         | -0.006(-0.019,0.008) | 0.450                 |       |
|                              | Weighted median              | 6                         | -0.005(-0.019,0.008) | 0.431                 |       |
|                              | MR Egger                     | 6                         | -0.011(-0.034,0.012) | 0.473                 |       |
|                              | egger_intercept              |                           |                      | 0.714                 |       |
|                              | MR-PRESSO(Outlier-corrected) | 6                         | -0.006(-0.015,0.003) | 0.277                 |       |
|                              | global test                  |                           |                      | 0.880                 |       |
|                              | Telomere length              | Inverse variance weighted | 6                    | 0.015(-0.016,0.045)   | 0.339 |
| Q-statistic                  |                              |                           |                      | <0.001                |       |
| Simple mode                  |                              | 6                         | 0.005(-0.009,0.020)  | 0.500                 |       |
| Weighted mode                |                              | 6                         | 0.004(-0.004,0.012)  | 0.386                 |       |
| Weighted median              |                              | 6                         | 0.004(-0.005,0.012)  | 0.382                 |       |
| MR Egger                     |                              | 6                         | -0.004(-0.064,0.057) | 0.912                 |       |
| egger_intercept              |                              |                           |                      | 0.520                 |       |

|                           |                           |                              |                              |                           |                      |                     |       |
|---------------------------|---------------------------|------------------------------|------------------------------|---------------------------|----------------------|---------------------|-------|
| GP17                      | Frailty index             | MR-PRESSO(Outlier-corrected) | 6                            | 0.007(-0.005,0.019)       | 0.330                |                     |       |
|                           |                           | global test                  |                              |                           | 0.003                |                     |       |
|                           |                           | Inverse variance weighted    | 2                            | 0.023(-0.021,0.067)       | 0.309                |                     |       |
|                           |                           | Q-statistic                  |                              |                           | 0.166                |                     |       |
|                           | Telomere length           | Inverse variance weighted    | 2                            | -0.016(-0.071,0.039)      | 0.560                |                     |       |
|                           |                           | Q-statistic                  |                              |                           | 0.004                |                     |       |
|                           |                           | Inverse variance weighted    | 4                            | 0.007(-0.018,0.033)       | 0.571                |                     |       |
|                           |                           | Q-statistic                  |                              |                           | 0.237                |                     |       |
|                           | Frailty index             | Simple mode                  | 4                            | -0.012(-0.059,0.034)      | 0.640                |                     |       |
|                           |                           | Weighted mode                | 4                            | -0.013(-0.055,0.028)      | 0.580                |                     |       |
| Weighted median           |                           | 4                            | 0.004(-0.024,0.033)          | 0.761                     |                      |                     |       |
| MR Egger                  |                           | 4                            | 0.035(-0.062,0.132)          | 0.556                     |                      |                     |       |
| GP18                      | Frailty index             | egger_intercept              |                              |                           | 0.621                |                     |       |
|                           |                           | MR-PRESSO                    | 4                            | -0.006(-0.033,0.02)       | 0.668                |                     |       |
|                           |                           | global test                  |                              |                           | 0.293                |                     |       |
|                           |                           | Inverse variance weighted    | 4                            | -0.004(-0.017,0.009)      | 0.584                |                     |       |
|                           | Telomere length           | Q-statistic                  |                              |                           | 0.369                |                     |       |
|                           |                           | Simple mode                  | 4                            | 0.008(-0.021,0.036)       | 0.636                |                     |       |
|                           |                           | Weighted mode                | 4                            | -0.013(-0.036,0.009)      | 0.329                |                     |       |
|                           |                           | Weighted median              | 4                            | 0.000(-0.016,0.017)       | 0.988                |                     |       |
|                           | Frailty index             | MR Egger                     | 4                            | -0.004(-0.059,0.051)      | 0.903                |                     |       |
|                           |                           | egger_intercept              |                              |                           | 0.995                |                     |       |
| GP19                      |                           | Frailty index                | MR-PRESSO(Outlier-corrected) | 4                         | 0.003(-0.009,0.016)  | 0.628               |       |
|                           |                           |                              | global test                  |                           |                      | 0.425               |       |
|                           | Inverse variance weighted |                              | 2                            | -0.044(-0.162,0.074)      | 0.469                |                     |       |
|                           | Q-statistic               |                              |                              |                           | 0.005                |                     |       |
|                           | Telomere length           | Inverse variance weighted    | 2                            | -0.054(-0.131,0.023)      | 0.170                |                     |       |
|                           |                           | Q-statistic                  |                              |                           | 0.003                |                     |       |
|                           |                           | Frailty index                | Wald ratio                   | 1                         | -0.010(-0.067,0.048) | 0.746               |       |
|                           |                           |                              | Wald ratio                   | 1                         | 0.007(-0.028,0.042)  | 0.699               |       |
|                           | GP20                      |                              | Frailty index                | Inverse variance weighted | 3                    | 0.004(-0.034,0.042) | 0.831 |
|                           |                           |                              |                              | Q-statistic               |                      |                     | 0.238 |
| Simple mode               |                           | 3                            |                              | -0.019(-0.076,0.037)      | 0.573                |                     |       |
| Weighted mode             |                           | 3                            |                              | -0.019(-0.075,0.038)      | 0.589                |                     |       |
| Telomere length           |                           | Weighted median              | 3                            | -0.004(-0.045,0.036)      | 0.829                |                     |       |
|                           |                           | MR Egger                     | 3                            | 0.202(-0.040,0.444)       | 0.349                |                     |       |
|                           |                           | GP22                         | Frailty index                | egger_intercept           |                      |                     | 0.353 |
|                           |                           |                              |                              | MR-PRESSO                 | 3                    | -                   | -     |
| global test               |                           |                              |                              |                           |                      | -                   |       |
| Inverse variance weighted |                           |                              |                              | 3                         | -0.020(-0.058,0.018) | 0.298               |       |
| Telomere length           | Q-statistic               |                              |                              |                           | 0.020                |                     |       |
|                           | Simple mode               |                              | 3                            | -0.004(-0.046,0.039)      | 0.876                |                     |       |
|                           | Weighted mode             |                              | 3                            | -0.010(-0.048,0.028)      | 0.671                |                     |       |
|                           | Weighted median           |                              | 3                            | -0.015(-0.043,0.013)      | 0.292                |                     |       |

|      |                 |                              |   |                      |       |
|------|-----------------|------------------------------|---|----------------------|-------|
| GP23 | Frailty index   | MR Egger                     | 3 | -0.049(-0.453,0.355) | 0.853 |
|      |                 | egger_intercept              |   |                      | 0.912 |
|      |                 | MR-PRESSO(Outlier-corrected) | 3 | -                    | -     |
|      |                 | global test                  |   |                      | -     |
|      |                 | Inverse variance weighted    | 4 | 0.011(-0.031,0.053)  | 0.600 |
|      |                 | Q-statistic                  |   |                      | 0.015 |
|      |                 | Simple mode                  | 4 | -0.009(-0.052,0.033) | 0.701 |
|      |                 | Weighted mode                | 4 | -0.011(-0.043,0.022) | 0.557 |
|      |                 | Weighted median              | 4 | -0.008(-0.037,0.022) | 0.609 |
|      |                 | MR Egger                     | 4 | -0.114(-0.263,0.034) | 0.271 |
|      | Telomere length | egger_intercept              |   |                      | 0.231 |
|      |                 | MR-PRESSO                    | 4 | -0.005(-0.048,0.037) | 0.820 |
|      |                 | global test                  |   |                      | 0.065 |
|      |                 | Inverse variance weighted    | 4 | -0.002(-0.018,0.013) | 0.761 |
|      |                 | Q-statistic                  |   |                      | 0.270 |
|      |                 | Simple mode                  | 4 | 0.007(-0.021,0.035)  | 0.667 |
|      |                 | Weighted mode                | 4 | 0.008(-0.014,0.029)  | 0.542 |
|      |                 | Weighted median              | 4 | 0.004(-0.013,0.021)  | 0.634 |
|      |                 | MR Egger                     | 4 | 0.029(-0.042,0.101)  | 0.508 |
|      |                 | egger_intercept              |   |                      | 0.468 |
| GP24 | Frailty index   | MR-PRESSO(Outlier-corrected) | 4 | 0.005(-0.009,0.020)  | 0.509 |
|      |                 | global test                  |   |                      | 0.406 |
|      | Telomere length | Wald ratio                   | 1 | -0.01(-0.039,0.019)  | 0.499 |
|      |                 | Wald ratio                   | 1 | 0.007(-0.010,0.024)  | 0.434 |

IgG, immunoglobulin G; GP, glycan peak; SNP, single-nucleotide polymorphism; CI, confidence intervals; IVs, instrumental variables; MR, Mendelian randomization; MR-PRESSO, Pleiotropy Residual Sum and Outlier; SNP, single nucleotide polymorphism.

**Supplementary Table S3.** Estimates of the causal effect of IgG N-glycosylation on the frailty index via multivariable MR

| Exposure | Outcome       | Method | Ivs | $\beta$ (95%CI)       | <i>p</i> |
|----------|---------------|--------|-----|-----------------------|----------|
| GP1      | Frailty index | MV-IVW | 56  | 0.021(-0.071,0.113)   | 0.655    |
| GP2      |               |        |     | 0.027(-0.106,0.160)   | 0.690    |
| GP4      |               |        |     | 0.016(-0.264,0.296)   | 0.910    |
| GP5      |               |        |     | 0.017(-0.112,0.146)   | 0.803    |
| GP6      |               |        |     | -0.036(-0.222,0.150)  | 0.704    |
| GP7      |               |        |     | -0.021(-0.239,0.197)  | 0.851    |
| GP8      |               |        |     | -0.057(-0.188,0.074)  | 0.391    |
| GP9      |               |        |     | -0.078(-0.190,0.034)  | 0.169    |
| GP10     |               |        |     | -0.011(-0.280,0.258)  | 0.938    |
| GP11     |               |        |     | -0.046(-0.189,0.097)  | 0.528    |
| GP12     |               |        |     | 0.017(-0.175,0.209)   | 0.862    |
| GP13     |               |        |     | -0.023(-0.146,0.100)  | 0.716    |
| GP14     |               |        |     | 0.109(-0.152,0.370)   | 0.413    |
| GP15     |               |        |     | 0.003(-0.326,0.332)   | 0.984    |
| GP16     |               |        |     | 0.058(-0.069,0.185)   | 0.370    |
| GP17     |               |        |     | -0.041(-0.262,0.180)  | 0.720    |
| GP18     |               |        |     | -0.101(-0.315,0.113)  | 0.351    |
| GP19     |               |        |     | -0.056(-0.227,0.115)  | 0.517    |
| GP20     |               |        |     | -0.030(-0.171,0.111)  | 0.674    |
| GP21     |               |        |     | 0.090(-0.108,0.288)   | 0.373    |
| GP22     |               |        |     | -0.043(-0.174,0.088)  | 0.525    |
| GP23     |               |        |     | -0.119(-0.219,-0.019) | 0.019    |
| GP24     |               |        |     | 0.081(-0.105,0.267)   | 0.392    |

IgG, immunoglobulin G; GP, glycan peak; SNP, single-nucleotide polymorphism; CI, confidence intervals; IVs, instrumental variables; MR, Mendelian randomization; IVW, inverse variance weighted; SNP, single nucleotide polymorphism.

**Supplementary Table S4.** Estimates of the causal effect of IgG N-glycosylation on telomere length via multivariable MR

| Exposure | Outcome         | Method | Ivs | $\beta$ (95%CI)      | <i>p</i> |
|----------|-----------------|--------|-----|----------------------|----------|
| GP1      | Telomere length | MV-IVW | 56  | 0.037(-0.055,0.129)  | 0.433    |
| GP2      |                 |        |     | 0.140(0.020,0.260)   | 0.023    |
| GP4      |                 |        |     | -0.153(-0.431,0.125) | 0.281    |
| GP5      |                 |        |     | -0.016(-0.139,0.107) | 0.802    |
| GP6      |                 |        |     | -0.013(-0.185,0.159) | 0.886    |
| GP7      |                 |        |     | -0.083(-0.308,0.142) | 0.473    |
| GP8      |                 |        |     | 0.008(-0.121,0.137)  | 0.899    |
| GP9      |                 |        |     | 0.002(-0.112,0.116)  | 0.972    |
| GP10     |                 |        |     | -0.027(-0.264,0.210) | 0.823    |
| GP11     |                 |        |     | 0.009(-0.118,0.136)  | 0.889    |
| GP12     |                 |        |     | -0.003(-0.193,0.187) | 0.975    |
| GP13     |                 |        |     | -0.094(-0.210,0.022) | 0.109    |
| GP14     |                 |        |     | -0.089(-0.338,0.160) | 0.481    |
| GP15     |                 |        |     | 0.038(-0.266,0.342)  | 0.806    |
| GP16     |                 |        |     | -0.036(-0.169,0.097) | 0.597    |
| GP17     |                 |        |     | -0.024(-0.234,0.186) | 0.819    |
| GP18     |                 |        |     | 0.011(-0.191,0.213)  | 0.913    |
| GP19     |                 |        |     | 0.015(-0.144,0.174)  | 0.852    |
| GP20     |                 |        |     | 0.138(-0.001,0.277)  | 0.052    |
| GP21     |                 |        |     | -0.043(-0.261,0.175) | 0.701    |
| GP22     |                 |        |     | -0.027(-0.149,0.095) | 0.661    |
| GP23     |                 |        |     | -0.011(-0.111,0.089) | 0.824    |
| GP24     |                 |        |     | -0.013(-0.178,0.152) | 0.878    |

IgG, immunoglobulin G; GP, glycan peak; SNP, single-nucleotide polymorphism; CI, confidence intervals; IVs, instrumental variables; MR, Mendelian randomization; IVW, inverse variance weighted; SNP, single nucleotide polymorphism.
